# Supplementary material
Source: bioRxiv or medRxiv preprint supplement (https://medrxiv.org/highwire/filestream/73147/field_highwire_adjunct_files/0/2020.03.01.20029884-1.pdf)
Supplement: Supplementary file [file 2020.03.01.20029884-1.pdf]

**Preliminary epidemiological analysis on children and adolescents with novel coronavirus disease 2019 outside Hubei Province in China: an observational study utilizing crowdsourced data**

Brandon Michael Henry<sup>1,3</sup>, Maria Helena Santos de Oliveira<sup>2,3</sup>

1. Cardiac Intensive Care Unit, The Heart Institute, Cincinnati Children's Hospital Medical Center, Ohio, USA
2. Department of Statistics, Federal University of Parana, Curitiba, Brazil
3. Pediatric COVID-19 Open Data Analysis Group, Ohio, USA

**Corresponding Author:**

Brandon Michael Henry, M.D.  
Cardiac Intensive Care Unit  
The Heart Institute  
Cincinnati Children's Hospital Medical Center  
3333 Burnet Avenue, Cincinnati, Ohio, 45229, USA  
Email: Brandon.henry@cchmc.org

## **ABSTRACT**

### **Background**

The outbreak of coronavirus disease 2019 (COVID-19) continues to expand across the world. Though both the number of cases and mortality rate in children and adolescents is reported to be low in comparison to adults, limited data has been reported on the outbreak with respect to pediatric patients. To elucidate information, we utilized crowdsourced data to perform a preliminary epidemiologic analysis of pediatric patients with COVID-19

### **Methods**

In this observational study, data was collected from two open-access, line list crowdsourced online databases. Pediatric cases of COVID-19 were defined as patients  $\leq 19$  years of age with a laboratory confirmed diagnosis. The primary outcomes were case counts and cumulative case counts. Secondary outcomes included days between symptoms onset and first medical care and days between first medical care and reporting. Tertiary outcomes were incidence of travel to Wuhan, incidence of infected family members and incidence of symptoms.

### **Results**

A total of 82 patients were included. The median age was 10 [IQR: 5-15] years. Patients from mainland China (outside Hubei) accounted for 46.3% of cases, while the remaining 53.7% of cases were international. Males and females accounted for 52.4% and 32.9% of cases, respectively, with the remaining 14.6% being designated as unknown. A male skew persisted across subgroup analyses by age group ( $p=1.0$ ) and location (inside/outside China) ( $p=0.22$ ). While the number of reported international cases has been steadily increasing over the study period, the number of reported cases in China rapidly decreased from the start point. The median reporting delay was 3 [IQR: 2-4.8] days. The median delay between symptom onset and first seeking medical care was

1 [IQR: 0-3.25] day. In international cases, time to first seeking medical care was a median of 2.5 days longer than in China ( $p=0.04$ ). When clinical features were reported, fever was the most common presentation (68.0%), followed by cough (36.0%).

### **Conclusions**

The number of reported international pediatric COVID-19 cases is rapidly increasing. COVID-19 infections are, to-date, more common in males than females in both the children and adolescent age groups. Additionally, this male predominance remains the case both inside and outside of China. Crowdsourced data enabled early analysis of epidemiologic variables in pediatric patients with COVID-19. Further data sharing is required to enable analyses that are required to understand the course of this infection in children.

## INTRODUCTION

The coronavirus disease 2019 (COVID-19) outbreak is rapidly expanding across the world and presents a significant public health emergency with the potential of becoming pandemic.<sup>1</sup> As of March 1, 2020, cases of COVID-19 have been reported in nearly 60 countries. In early stages of epidemics with emerging pathogens, real-time analysis of accurate and robust epidemiological and clinical data is essential to developing interventional strategies and guiding public health decision-making.<sup>2,3</sup> Such data can provide insight into infectivity, routes of transmission, disease severity, and outcomes, thus enabling epidemiologic modelling and improved public health responses.<sup>4,5</sup>

Line list data, which includes individual patient-level data on important epidemiological and clinical variables, is rarely available early during an outbreak with a novel pathogen.<sup>5</sup> However, recognizing the utility of such data and its ability to provide for real-time analyses, multiple academic groups have been curating line list data using crowdsourcing and openly sharing the data with the scientific community.<sup>4,5</sup> Crowdsourcing enables the collection of data from multiple platforms including health-care-oriented social networks, government and public health agencies, and global news sources.

Sun et al. recently reported the first epidemiological analysis of crowdsourced data in 507 COVID-19 patients.<sup>5</sup> However, the number of pediatric cases, at least in the early stages of this outbreak, is limited. In a recent report, of the 44,672 confirmed COVID-19 cases in China, only 2.1% were in pediatric patients ( $\leq 19$  years of age).<sup>6</sup> The reason for this remains unknown but may be due to underreporting of pediatric cases, as well as a combination of biologic and epidemiologic factors. During both the Severe Acute Respiratory Syndrome (SARS) and Middle Eastern Respiratory Syndrome (MERS) outbreaks, a limited number of cases with milder symptoms, fewer hospitalizations, and less mortality were observed in children as compared to adults.<sup>7-9</sup>

As children and adolescents represent a unique patient group, pediatric specific analyses of epidemiologic data may enable a better understanding of COVID-19 in these patients and provide situational-awareness to the pediatric health community. In this study, we analyzed pediatric cases of COVID-19 outside Hubei province in China collected from two crowdsourced curated individual line list data. We present early data on case counts, travel history, time between symptom onset, seeking medical care, and reporting, and symptomatology.

## **METHODS**

### **Study Design**

In this observational study, we collected data on children and adolescent cases of laboratory confirmed COVID-19 from two open access crowdsourced line list databases sets through March 1, 2020. Due to the format of reporting age, as well as significant lack of any age data for most patients, cases from within Hubei province of China were not able to be analyzed. As such, only cases from outside the Hubei province in China and international cases were included. However, patients who lived in Hubei and were repatriated were included in the analysis.

The methods of data curation for each of the used line lists has been previously published.<sup>4,5</sup> In brief, the data curated by Sun et al. for China was collected from DXY.cn, a social network for Chinese health-care professionals, which provides real-time coverage of COVID-19 with de-identified patient data reported directly by public health agencies or state media.<sup>5</sup> Each report is linked to an original source to allow for authentication. In addition, for international cases, data was curated from media sources and national health agencies. Their data is updated regularly and is freely available on the website of the Laboratory for the Modeling of Biological + Socio-technical systems website of Northeastern University. The second data set by Xu et al. (Open

COVID-19 Data Curation Group) of confirmed COVID-19 cases was curated from multiple sources including World Health Organization (WHO) reports, national departments of health, and Chinese local, provincial, and national health authorities.<sup>4</sup> Their data is freely available online via Google Drive.

As only de-identified patient data from publicly available databases was used in this study, no patient consent was obtained, and no ethical approval was required. This study is reported in compliance with Strengthening the Reporting of Observational Studies in Epidemiology (STROBE) Statement guidelines for observational studies (Supplement 1).

### **Data Collection**

Data on pediatric patients were collected from both of the line lists. This included age or age range, sex, location, date of symptom onset, date of seeking medical care, and date of COVID-19 reporting. When available, travel history, information on infected relatives, and symptomatology were also collected.

After collecting cases from both databases, overlap of patients was assessed using age, location, and the three above mentioned dates. In the event of suspected duplicate patients, one case was removed from the dataset.

### **Study Definitions and Outcomes**

Pediatric cases of COVID-19 were defined as patients  $\leq 19$  years of age with a laboratory confirmed diagnosis of SARS coronavirus 2 (SARS-CoV-2) infection.<sup>5</sup> The definition of a laboratory confirmed cases is a patient blood or respiratory tract sample positive for SARS-CoV-2 by quantitative RT-PCR, or presence of viral genome highly homologous to reference sequence for SARS-CoV-2. Due to the format of data reporting from some Chinese provinces employing

age ranges instead of raw age, the following classifications were employed for this study: children (0-≤12 years of age) and adolescents (13-≤19 years of age).

The primary outcome of this epidemiologic analysis was case counts and cumulative case counts. Secondary outcomes included days between symptoms onset and first visit to hospital or clinic, and days between first visit to hospital or clinic and reporting. Tertiary outcomes included incidence of travel to Wuhan, China, incidence of family members with a positive COVID-19 diagnosis, and incidence of symptoms.

### **Statistical Analysis**

Categorical variables were reported as frequency (%) and continuous variables as median (interquartile range). Subgroups analyzed included age range, sex, and location. Case counts were compared between subgroups using Fisher's exact test. Weekly case counts were analyzed using the date of reporting. Differences in delays between symptoms onset and first visit to hospital or clinic and days between first visit to hospital or clinic and diagnostic confirmation were compared between subgroups using Wilcoxon test. All statistical analyses were performed using R (version 3.6.1 (2019-07-05)) with a p-value of <0.05 being considered as significant.

## **RESULTS**

After combing the two line lists, a total of 100 pediatric cases were identified. Pediatric cases represented 3.0% of Sun et al.<sup>5</sup> line list and 0.5% of the Xu et al.<sup>4</sup> line list. Following removal of 18 duplicates, a total of 82 pediatric patients were included in this analysis. The date range of cases was January 21, 2020 to February 28, 2020. Patients from mainland China (outside Hubei province) accounted for 38 (46.3%) cases, while the remaining 44 cases (53.7%) were international. Within China, Yunnan province accounts for the most cases (n=8, 21.1% of cases in China). A breakdown of cases within China by province is presented in Supplement 2. Outside

China, Japan has the most pediatric cases included in this analysis (n=15), accounting for 34.1% of all international cases. In total, cases from 14 countries were included (Table 1).

The median age of patients was 10 [IQR: 5-15] years. The distribution of patients by age is presented in Figure 1. No significant difference between cases inside and outside China (10 [IQR: 5-15] inside vs. 9 [IQR: 5-15.5] outside; p=0.91). For 13 patients (15.9%), only an age range was available. To include these patients in further analyses, cases were split into two age groups based on how data was reported in the line lists. There were 53 children (65.6%) between 0-12 years and 27 adolescents (32.9%) between 13-19 years, with 2 missing age range data (2.4%).

Males accounted for 52.4% of included cases, females accounted for 32.9% and 14.6% were unknown (Table 2). When broken down by age range, no significant differences were observed between the proportion of cases between age groups (p=1.0), with a male skew of cases seen within both (Table 2). When compared by location, males accounted for 52.6% of cases within China and 57.3% outside China (p=0.22).

A timeline of cases and cumulative cases is presented in Figure 2 by age range and Figure 3 by location. In both children and adolescents, weekly cases peaked between January 20-26, 2020. The number of reported cases continued to drop reaching a low in mid-February, then undergoing a rapid increase sustained through to the end of the study period, driven by new international cases. Within China, the number of weekly cases steadily decreased from the beginning of the study, with no new cases added to the databases since February 3-9, 2020. The number of cumulative international cases has been constantly increasing over the study period with a more rapid increase in recent weeks.



The median delay between first visit to hospital/clinic and reporting was 3 [IQR: 2.0-4.8] days (n=14). No significant differences in this delay time was observed for subgroups of age (p=0.29) or location (inside/outside China) (p=0.67).

The median delay between the onset of symptoms and first visit to hospital/clinic was 1 [IQR: 0-3.3] day (n=20). There was no significant difference with respect to age subgroup (p=0.93). However, within China this delay was significantly shorter with a median duration of 1 day [IQR: 0-2.5] versus 3.5 [IQR: 1.5-7] days abroad (p=0.04).

A total of 14 (17.1%) cases were in patients who lived in Wuhan, China and were repatriated. Among the remaining 68 cases, 25 (30.5%) patients had a history of travel to Wuhan. No information on travel history was available for the other 43 (52.4%) patients.

A total of 29 (35.4%) patients were noted to have an infected family member. In one adolescent case in Japan, the patient was the son of a physician who had earlier tested positive for the virus.

Data on patient symptomatology was available in 25 (30.5%) of the cases. Fever was the most common symptom, present in 17 (68.0%) of those cases, while 2 (8.0%) cases were asymptomatic. Cough was reported in 9 (36.0%) cases. A breakdown of patient symptoms is presented in Table 3. Data on disease severity, need for hospitalization or intensive care support, and patient outcome was not available for analysis.

## **DISCUSSION**

Real-time analysis of crowdsourced individual line list data provides a tool for monitoring outbreaks with novel pathogens in early stages, as witnessed with Ebola.<sup>5,10</sup> Though this data is often difficult to obtain at the start of an outbreak, thanks to the efforts of multiple academic teams in curating line list data from multiple sources, we have been able to gain some insight into the

current COVID-19 outbreak in children.<sup>4,5</sup> Though this data cannot replace official data and analyses provided by national and international health agencies, it can enable rapid analysis of data and dissemination of key information in the preliminary stages of outbreak when minimal other data is available, and, as applied in this study, early data on specific subsets of patients.<sup>5</sup>

Reports from both the Chinese Center for Disease Control and Prevention and the WHO on the current COVID-19 outbreak, have found pediatric patients represent a small proportion of patients, with an attack rate of 2.4%.<sup>6,11</sup> Children with COVID-19 appear to have milder symptoms as noted by a severe case rate of 2.5%, with only 0.2% developing critical illness.<sup>11</sup> Similar finding of limited cases and milder symptoms in children was observed in both SARS and MERS outbreaks.<sup>7-9</sup> However, whether the limited number of pediatric COVID-19 cases is due to less susceptibility or milder presentation leading to missed detection remains unknown. Moreover, the role of children in transmission is still unknown.

This study combined data from two crowdsourced line lists to obtain a sample of pediatric patients with COVID-19 in order to gain some preliminary insights into the outbreak in children and adolescents. Cases in these patients represented only a small proportion of each line list. The limited number of pediatric cases is likely multifactorial. Age related differences in innate immunity<sup>12,13</sup>, in which monocytes and macrophages may play an important role controlling an emerging viral pathogen, may be partially responsible for the milder observed symptoms and asymptomatic cases. Others have suggested that respiratory tract health, including less exposure to pollution, as well as lung epithelial cell senescence and immunosenescence of immune cells of the respiratory system may play a role.<sup>14</sup> In both MERS and SARS outbreaks, children were less likely to develop severe respiratory distress seen in adults, experiencing a pneumonia or common cold symptoms.<sup>7-9</sup> Additionally, exposure of young children in China to other coronaviruses, such

as OC43, 229E, NL63, and HKU1,<sup>15</sup> may impart some immunity not reinforced in older individuals, explaining partial protection against COVID-19 in children.<sup>16,17</sup>

Comorbidities have been reported to be associated with severity of COVID-19 infection.<sup>18,19</sup> As children generally have less comorbidities, this may explain in part the lack of serious infections in children and contributing to decreased detection. Moreover, behavioral differences and limited travel as compared to adults may have also explained the limited number of cases early in the outbreak.<sup>5</sup>

In our data set, children (those less than 12 years old) made up a larger proportion of included cases. This is different than data presented in a recent Chinese CDC report which showed a slightly greater number of cases in those over age 10.<sup>6</sup> Whether this is due to the availability of cases in the line lists or a higher detection of cases in young children outside China is unclear, however, this should be monitored going forward. In general, infants and young children are often at increased risk of poor outcomes from respiratory infections,<sup>20</sup> which has not yet been witnessed with COVID-19 from reported aggregate data.<sup>6</sup>

Interestingly, a significant male skew in cases was observed in pediatric patients throughout the analysis. This sex skew was not observed among children in SARS or MERS. In adults, cases of COVID-19 are reported to be skewed towards men also.<sup>5,6</sup> However, explanations applied to adults, such as the high prevalence rates of smoking<sup>21</sup> and comorbidities (i.e. cardiovascular disease and diabetes)<sup>22,23</sup> in Chinese men as compared to women, would not apply to children. While the fact that adult females produce more robust inflammatory responses as compared to men may also in part explain this effect, the opposite is true in infants and children.<sup>24</sup> Young males produce stronger inflammatory responses than females.<sup>24</sup> However, females, beginning at birth

and persisting throughout adulthood, have higher numbers of CD4+ T cells and higher CD4/CD8 T cell ratios<sup>24</sup>, though the potential impact of this on COVID-19 infections is unknown.

The male skew persisted through subgroup analysis by age, with no difference in the rate of infected males in children versus adolescents. As such, the impact of the protective effects of estrogen receptor signaling protective for females in studies on SARS is likely minimal,<sup>25</sup> as a more balanced sex ratio would be expected in younger children as compared to older pubescent females.

To account for the skew in the sex ratio in the Chinese population as a potential confounder, we compared the incidence of cases by sex inside and outside China, finding no significant differences. Larger epidemiologic studies are needed to confirm this sex skew in children and adolescents COVID-19 cases and, if persistent, further investigations are needed to understand this phenomenon.

The weekly counts of reported cases in this study showed unique trends based on geographical region. In China, a rapid drop from a peak at study initiation on January 20 to no new cases after February 9 was observed. In the study by Sun et al., they used January 18 as the date when media and public awareness of COVID-19 became more pronounced, followed by significant governmental efforts aimed at containment.<sup>5</sup> No cases in this data set were reported before this date. Whether the decrease in new cases in China is due to reporting difficulties/lack of case inclusion in the line lists or effectiveness of Chinese public health interventions aimed at slowing the spread of the virus, or a combination of both, is unclear.

Internationally, the number of reported cases has steadily increased with a faster pace in recent weeks. We expect that this trend will continue, especially as testing becomes more readily available in new countries. In Figure 3A, a small dip in reported cases in the last few days of

February is observed. We believe that this is primarily due to the delay in reporting, which was calculated to be a median of 3 days from the first medical visit in this study. As such, we expect to see the number of cases in the last week increase in the coming days.

Though analyzed based on a small subset of included patients, patients in China were found to first receive medical attention a median of 2.5 days sooner after initiation of symptoms than those abroad. We hypothesize that this is due to heightened awareness of COVID-19 in China and perception of decreased risk of COVID-19 infection among those abroad. However, this is opposite of the trend observed by Sun et al., which may be due to a higher number of international travelers in their data set.<sup>5</sup>

Data on patient symptoms was only available for 25 patients. Fever was the most common presentation, followed by cough, with only 2 being asymptomatic. However, how representative this small sample is remains unclear. Moreover, as this data was not collected directly for the purpose of this analysis, we can not verify if a systematic review of symptoms was performed. The WHO Joint Mission reported that many pediatric cases were identified through contact tracing in households with infected adults and reported many pediatric patients had only mild symptoms.<sup>11</sup> A report by Chan et. al on COVID-19 clusters found in one household that 5 adults had symptomatic infections, while a child present in the residence tested positive for COVID-19 but was asymptomatic.<sup>26</sup> An infected family member was commonly reported in the present study.

While the WHO has noted that COVID-19 appears to present differently from SARS, fever followed by cough, was the most common presentation of SARS in children.<sup>7,11</sup> However, further progression of COVID-19 illness in children beyond initial presentation as compared to SARS requires further data and analysis. Based on the obtained data, we suggest that in the presence of

active community transmission in a region, children presenting with a fever of unknown cause or with a fever in the presence of common cold symptoms should be tested for COVID-19.

This study has several limitations. First, it presents data from a limited sample of total pediatric cases of COVID-19. As noted by Sun et al., line list data is available for only a small number of Chinese provinces, while aggregated data on number of cases and mortality is provided by all.<sup>5</sup> As such, cases from some provinces, including Hubei which is the center of the initial outbreak, were not able to be included. Cases in this study may also be those in whom the disease was severe enough to seek medical attention or identified by contact tracing, and as such, many minor cases may have been missed and symptomatology data skewed.<sup>5</sup> Additionally, crowdsourced data would be less likely to capture mild cases as curated via the applied data collection modalities.<sup>5</sup> Missing data was common for many of the included variables. Further efforts should be made to collect follow up data on patient outcomes.

Limited data in children with respect to travel history or exposure prevented any estimation of incubation time. Sun et al. reported a median incubation time of 4.5 days [IQR: 3.0-5.5]<sup>5</sup>, while others using their data and other data sets have reported incubation rates of 5-6 days.<sup>19,27-29</sup> Further efforts should be made in the coming weeks to estimate incubation in pediatric patients to improve public health guidance

As the outbreak progresses and the curated line lists continue to grow, further analyses of pediatric epidemiologic data should be performed regularly. To that end, the authors have established the Pediatric CO-VID19 Open Data Analysis Group, an international collaborative effort to study the disease in children and adolescents. However, line lists curated by academic teams will struggle to keep pace with the rapid increase in number of cases as COVID-19 trends towards pandemic. We encourage coordinated efforts between national and international health agencies and

academia to produce line lists of patients which in turn will better enable the medical community to develop effective interventions against COVID-19.

## **CONCLUSIONS**

The number of reported COVID-19 cases in pediatric patients is rapidly increasing around the world. To date, COVID-19 infections are significantly more common in males than females in both children and adolescents inside and outside of China. When symptomatic, fever is the most common presentation, with or without symptoms of a common cold. In this study, crowdsourced data enabled early analysis of epidemiologic variables in pediatric patients with COVID-19. Analyses of larger datasets are urgently needed to better understand this infection in children and provide further situational awareness to the pediatric health community.

## **DATA SHARING**

The line lists used in this study are freely available online at the website of the [Laboratory for the Modeling of Biological + Socio-technical Systems](#) of Northeastern University and [Google Drive](#).

Those interested in our pediatric specific dataset can email the corresponding author for data. The Pediatric CO-VID19 Open Data Analysis Group, a working group established to analyze pediatric epidemiologic and clinical data on COVID-19, strongly welcomes collaboration and participation from the international medical and scientific community. Those interested are encouraged to contact the corresponding author.

## **ACKNOWLEDGEMENTS**

The authors would like to thank everyone involved in the curation of the line list datasets that enabled this study. The results and conclusions in this study are those of the authors and do not represent the official position of their respective institutions. The authors declare no conflicts of interest.

## **FUNDING**

None.



## REFERENCES

1. WHO. Statement on the second meeting of the International Health Regulations (2005) Emergency Committee regarding the outbreak of novel coronavirus (2019-nCoV). Geneva 2020. [https://www.who.int/news-room/detail/30-01-2020-statement-on-the-second-meeting-of-the-international-health-regulations-\(2005\)-emergency-committee-regarding-the-outbreak-of-novel-coronavirus-\(2019-ncov\)](https://www.who.int/news-room/detail/30-01-2020-statement-on-the-second-meeting-of-the-international-health-regulations-(2005)-emergency-committee-regarding-the-outbreak-of-novel-coronavirus-(2019-ncov)). Accessed March 1, 2020.
2. Rivers C, Chretien J-P, Riley S, et al. Using “outbreak science” to strengthen the use of models during epidemics. *Nat Commun.* 2019;10(1):1-3. doi:10.1038/s41467-019-11067-2
3. Morgan O. How decision makers can use quantitative approaches to guide outbreak responses. *Philos Trans R Soc Lond B Biol Sci.* 2019;374(1776):20180365. doi:10.1098/rstb.2018.0365
4. Xu B, Kraemer MUG, Xu B, et al. Open access epidemiological data from the COVID-19 outbreak. *Lancet Infect Dis.* 2020;0(0). doi:10.1016/S1473-3099(20)30119-5
5. Sun K, Chen J, Viboud C. Early epidemiological analysis of the coronavirus disease 2019 outbreak based on crowdsourced data: a population-level observational study. *Lancet Digit Health.* 2020;0(0). doi:10.1016/S2589-7500(20)30026-1
6. The Novel Coronavirus Pneumonia Emergency Response Epidemiology Team. The Epidemiological Characteristics of an Outbreak of 2019 Novel Coronavirus Diseases (COVID-19) — China, 2020. *China CDC Wkly.* 2020;2(8):113-122.
7. Stockman LJ, Massoudi MS, Helfand R, et al. Severe acute respiratory syndrome in children. *Pediatr Infect Dis J.* 2007;26(1):68-74. doi:10.1097/01.inf.0000247136.28950.41

8. Thabet F, Chehab M, Bafaqih H, AlMohaimeed S. Middle East respiratory syndrome coronavirus in children. *Saudi Med J*. 2015;36(4):484-486. doi:10.15537/smj.2015.4.10243
9. Memish ZA, Al-Tawfiq JA, Assiri A, et al. Middle East respiratory syndrome coronavirus disease in children. *Pediatr Infect Dis J*. 2014;33(9):904-906.  
doi:10.1097/INF.0000000000000325
10. Cleaton JM, Viboud C, Simonsen L, Hurtado A, Chowell G. Characterizing Ebola Transmission Patterns Based on Internet News Reports. *Clin Infect Dis*. 2016;62(1):24-31.  
doi:10.1093/cid/civ748
11. WHO-China Joint Mission. Report of the WHO-China Joint Mission on Coronavirus Disease 2019 (COVID-19). Geneva 2020. <https://www.who.int/docs/default-source/coronaviruse/who-china-joint-mission-on-covid-19-final-report.pdf>. Accessed March 1, 2020.
12. Shaw AC, Goldstein DR, Montgomery RR. Age-dependent dysregulation of innate immunity. *Nat Rev Immunol*. 2013;13(12):875-887. doi:10.1038/nri3547
13. Simon AK, Hollander GA, McMichael A. Evolution of the immune system in humans from infancy to old age. *Proc R Soc B Biol Sci*. 2015;282(1821). doi:10.1098/rspb.2014.3085
14. Busse PJ, Mathur SK. Age-related Changes in Immune Function: Impact on Airway Inflammation. *J Allergy Clin Immunol*. 2010;126(4):690-701.  
doi:10.1016/j.jaci.2010.08.011

15. Zeng Z-Q, Chen D-H, Tan W-P, et al. Epidemiology and clinical characteristics of human coronaviruses OC43, 229E, NL63, and HKU1: a study of hospitalized children with acute respiratory tract infection in Guangzhou, China. *Eur J Clin Microbiol Infect Dis Off Publ Eur Soc Clin Microbiol*. 2018;37(2):363-369. doi:10.1007/s10096-017-3144-z
16. Simonsen L, Spreeuwenberg P, Lustig R, et al. Global Mortality Estimates for the 2009 Influenza Pandemic from the GLaMOR Project: A Modeling Study. *PLoS Med*. 2013;10(11). doi:10.1371/journal.pmed.1001558
17. Leung GM, Hedley AJ, Ho L-M, et al. The epidemiology of severe acute respiratory syndrome in the 2003 Hong Kong epidemic: an analysis of all 1755 patients. *Ann Intern Med*. 2004;141(9):662-673. doi:10.7326/0003-4819-141-9-200411020-00006
18. Huang C, Wang Y, Li X, et al. Clinical features of patients infected with 2019 novel coronavirus in Wuhan, China. *The Lancet*. 2020;395(10223):497-506. doi:10.1016/S0140-6736(20)30183-5
19. Li Q, Guan X, Wu P, et al. Early Transmission Dynamics in Wuhan, China, of Novel Coronavirus–Infected Pneumonia. *N Engl J Med*. doi:10.1056/NEJMoa2001316
20. Greenbaum AH, Chen J, Reed C, et al. Hospitalizations for severe lower respiratory tract infections. *Pediatrics*. 2014;134(3):546-554. doi:10.1542/peds.2014-0244
21. Parascandola M, Xiao L. Tobacco and the lung cancer epidemic in China. *Transl Lung Cancer Res*. 2019;8(Suppl 1):S21-S30. doi:10.21037/tlcr.2019.03.12

22. Yang W, Lu J, Weng J, et al. Prevalence of diabetes among men and women in China. *N Engl J Med*. 2010;362(12):1090-1101. doi:10.1056/NEJMoa0908292
23. Yao M-F, He J, Sun X, et al. Gender Differences in Risks of Coronary Heart Disease and Stroke in Patients with Type 2 Diabetes Mellitus and Their Association with Metabolic Syndrome in China. *Int J Endocrinol*. 2016;2016. doi:10.1155/2016/8483405
24. Klein SL, Flanagan KL. Sex differences in immune responses. *Nat Rev Immunol*. 2016;16(10):626-638. doi:10.1038/nri.2016.90
25. Channappanavar R, Fett C, Mack M, Ten Eyck PP, Meyerholz DK, Perlman S. Sex-Based Differences in Susceptibility to Severe Acute Respiratory Syndrome Coronavirus Infection. *J Immunol Baltim Md 1950*. 2017;198(10):4046-4053. doi:10.4049/jimmunol.1601896
26. Chan JF-W, Yuan S, Kok K-H, et al. A familial cluster of pneumonia associated with the 2019 novel coronavirus indicating person-to-person transmission: a study of a family cluster. *The Lancet*. 2020;395(10223):514-523. doi:10.1016/S0140-6736(20)30154-9
27. Lauer SA, Grantz KH, Bi Q, et al. The incubation period of 2019-nCoV from publicly reported confirmed cases: estimation and application. *medRxiv*. February 2020:2020.02.02.20020016. doi:10.1101/2020.02.02.20020016
28. Zhao S, Lin Q, Ran J, et al. Preliminary estimation of the basic reproduction number of novel coronavirus (2019-nCoV) in China, from 2019 to 2020: A data-driven analysis in the early phase of the outbreak. *Int J Infect Dis IJID Off Publ Int Soc Infect Dis*. 2020;92:214-217. doi:10.1016/j.ijid.2020.01.050

29. Backer JA, Klinkenberg D, Wallinga J. Incubation period of 2019 novel coronavirus (2019-nCoV) infections among travellers from Wuhan, China, 20–28 January 2020.

*Eurosurveillance*. 2020;25(5). doi:10.2807/1560-7917.ES.2020.25.5.2000062

**TABLES.**

**Table 1. Geographical Distribution of Pediatric COVID-19 Cases (n=82).**

| Country              | Pediatric Cases of COVID-19 |                |           |
|----------------------|-----------------------------|----------------|-----------|
|                      | Age 0-12                    | Age 13-19      | TOTAL     |
| Australia            | 1<br>(100.0%)               | -              | 1         |
| China                | 25<br>(65.8%)               | 13<br>(34.2%)  | 38        |
| France               | 1<br>(100.0%)               | -              | 1         |
| Hong Kong            | -                           | 1<br>(100.0%)  | 1         |
| Italy                | 3<br>(42.9%)                | 4<br>(57.1%)   | 7         |
| Japan                | 10<br>(66.6%)               | 5<br>(33.3%)   | 15        |
| Malaysia             | 4<br>(100.0%)               | -              | 4         |
| Singapore            | 4<br>(80.0%)                | 1<br>(20.0%)   | 5         |
| South Korea          | 1<br>(50.0%)                | 1<br>(50.0%)   | 2         |
| Spain                | -                           | 1<br>(100.0%)  | 1         |
| Switzerland          | **                          | **             | 2         |
| Thailand             | 2<br>(100.0%)               | -              | 2         |
| United Arab Emirates | 1<br>(100.0%)               | -              | 1         |
| Vietnam              | 1<br>(50.0%)                | 1<br>(50.0%)   | 2         |
| <b>TOTAL</b>         | <b>53 (%)</b>               | <b>27 (3%)</b> | <b>82</b> |

\*Data presented as n= (%).

\*\*No age data was available on the cases from Switzerland.

**Table 2. Sex Distribution of Pediatric COVID-19 Cases.**

| <b>Age Group</b> | <b>Male</b>   | <b>Female</b> | <b>Unknown</b> |
|------------------|---------------|---------------|----------------|
| 0-12             | 20<br>(56.6%) | 19<br>(35.8%) | 4<br>(7.5%)    |
| 13-19            | 13<br>(48.1%) | 8<br>(29.6%)  | 6<br>(22.0%)   |
| <b>Total</b>     | 43<br>(52.4%) | 27<br>(32.9%) | 10<br>(12.5%)  |

\*Data presented as n= (%). Age and sex was unknown for 2 patients.

**Table 3. Reported Symptoms in Pediatric COVID-19 Cases (n=25).**

| <b>Symptom</b> | <b>Number of Cases</b> |
|----------------|------------------------|
| Fever          | 17 (68.0%)             |
| Cough          | 9 (36.0%)              |
| Pharyngitis    | 3 (12.0%)              |
| Rhinorrhea     | 2 (8.0%)               |
| Abdominal Pain | 1 (4.0%)               |
| Diarrhea       | 1 (4.0%)               |
| Malaise        | 1 (4.0%)               |
| Asymptomatic   | 2 (8.0%)               |

\*Data presented as n= (%).



**FIGURES.**

**Figure 1. Age distribution of COVID-19 patients (n=69).**

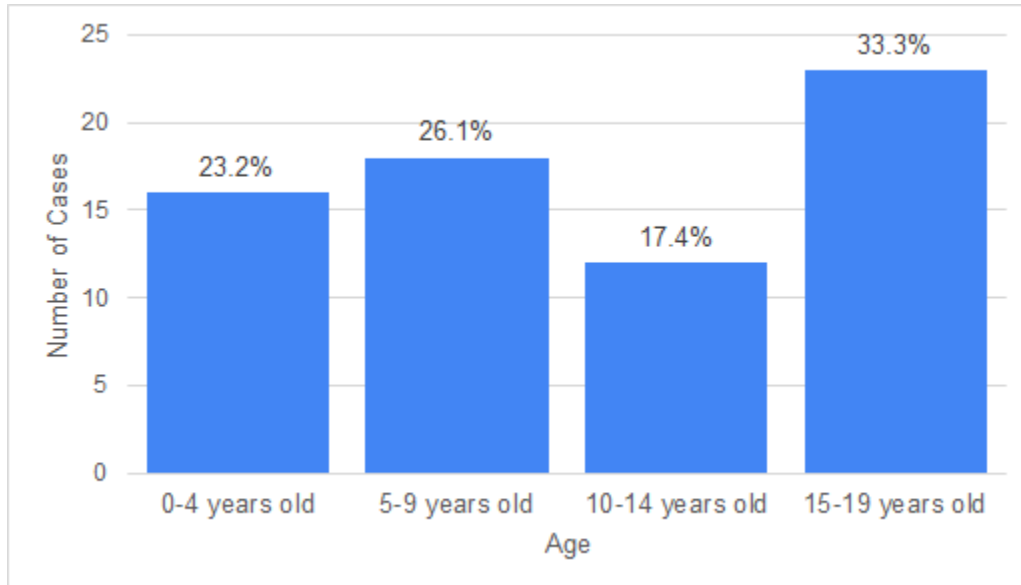

**Figure 2. Number of Weekly Cases (A) and Cumulative (B) Weekly Cases of Pediatric COVID- by Age Group.**

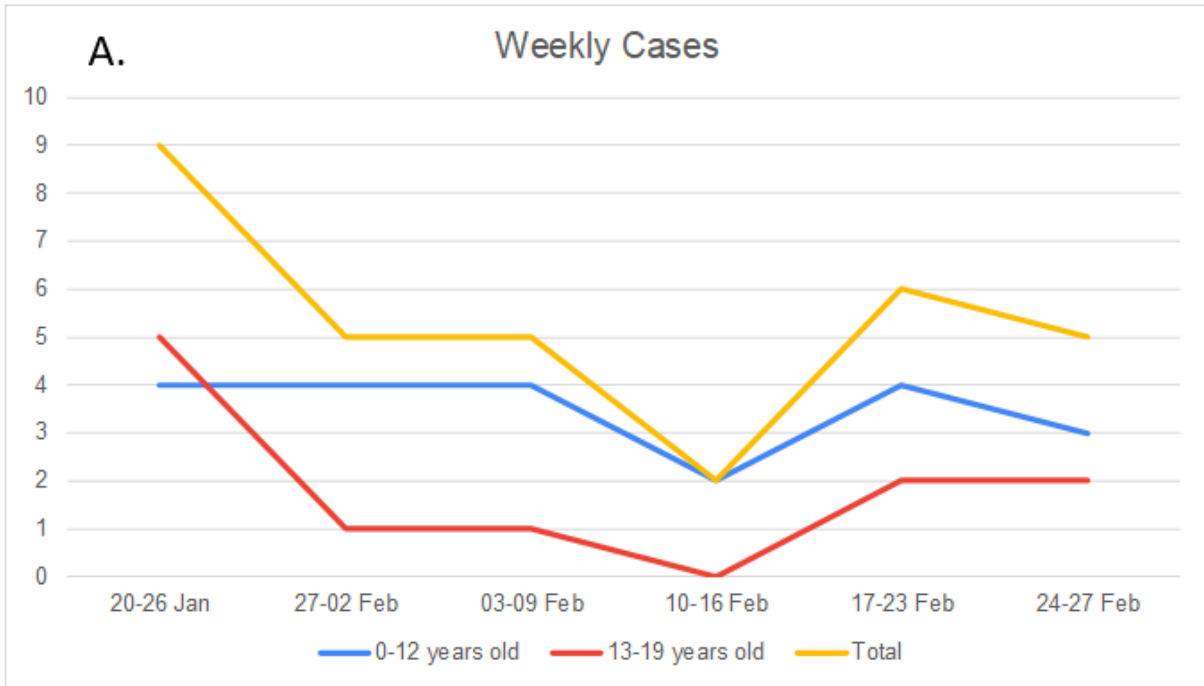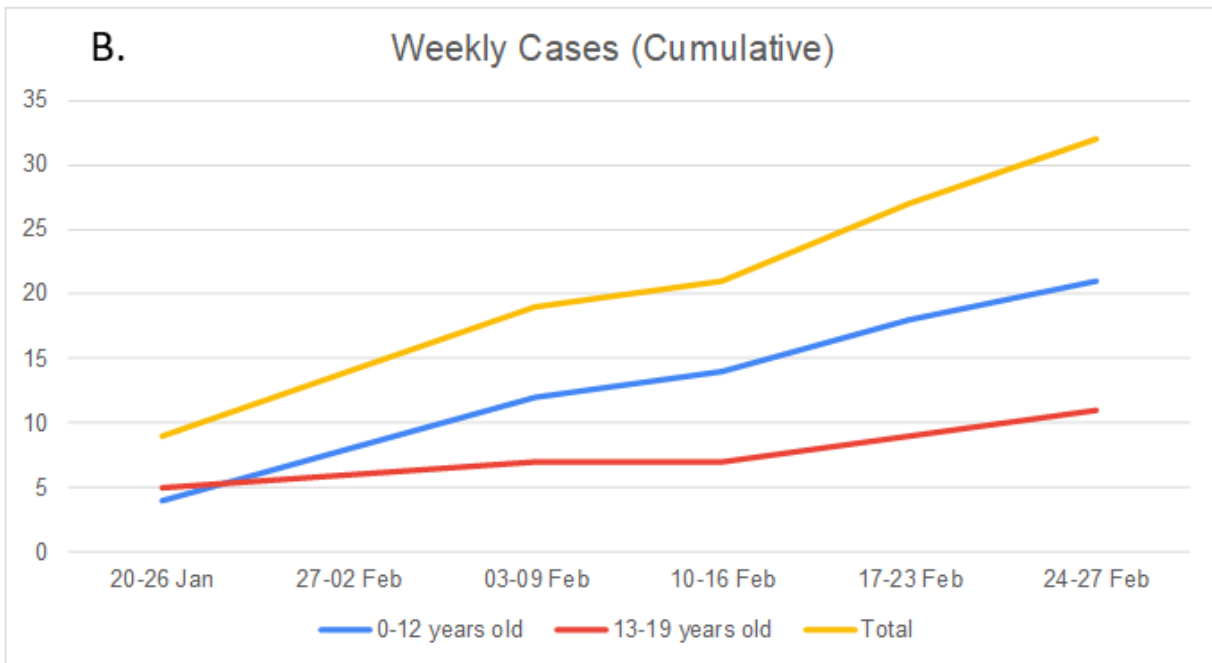

**Figure 3. Number of Weekly Cases (A) and Cumulative (B) Weekly Cases of Pediatric COVID- by location inside versus outside China.**

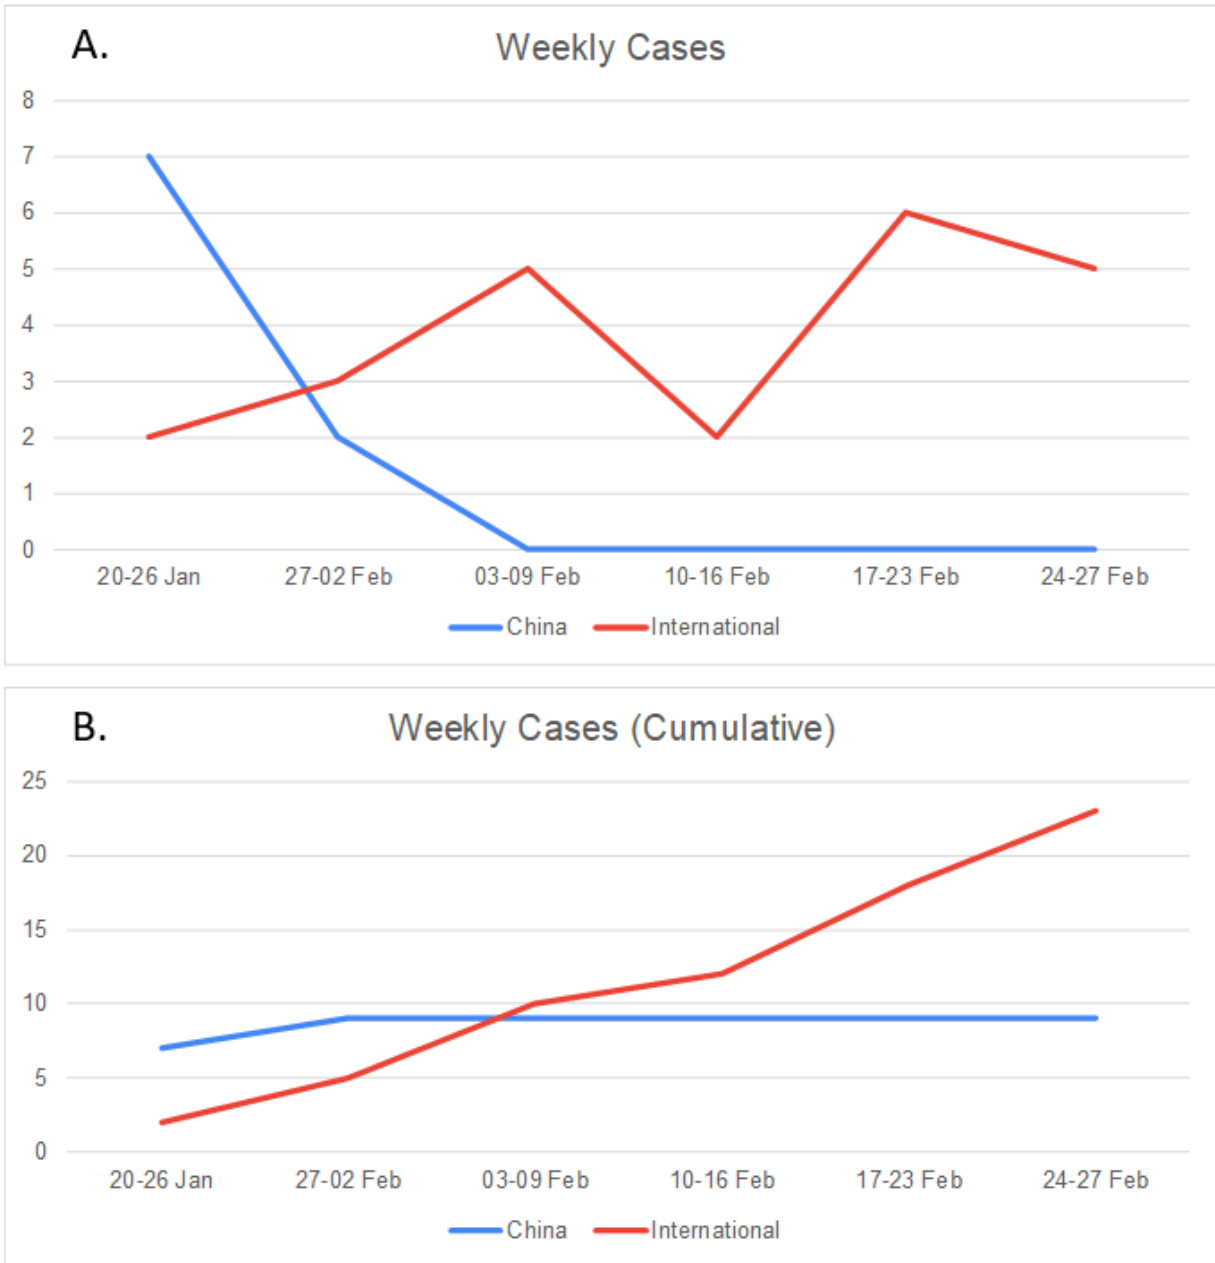

## **SUPPLEMENT LEGENDS**

**Supplement 1. STROBE Statement Checklist**

**Supplement 2. Distribution of Included Pediatric COVID-19 Cases in Chinese Provinces  
(n=38).**
